# Supplementary material for: Bioinformatic analyses of mammalian 5'-UTR sequence properties of mRNAs predicts alternative translation initiation sites
Source: Springer Nature journal article supplement (doi:10.1186/1471-2105-9-232), 2008-05-08
Supplement: Additional file 2 [file 1471-2105-9-232-s2.pdf]

**Supplemental Table 2: Provisional aTIS RefSeq mRNA Sequences**

| Accession      | Protein Name                                                          | codon | species               |
|----------------|-----------------------------------------------------------------------|-------|-----------------------|
| NM_001038632   | DNase X (LOC654408)                                                   | ctg   | Sus scrofa            |
| NM_133190      | calcium channel, voltage-dependent, gamma subunit 8 (Cacng8)          | ctg   | Mus musculus          |
| XM_001090384   | PREDICTED: BCL2-associated athanogene                                 | ctg   | Macaca mulatta        |
| XM_001116068   | PREDICTED: Voltage-dependent calcium channel gamma-8 subunit          | ctg   | Macaca mulatta        |
| XM_849171      | Voltage-dependent calcium channel gamma-8 subunit                     | tgg   | Canis familiaris      |
| L33264         | CDC2-related protein kinase (PISSLRE)                                 | ctg   | Homo sapiens          |
| XR_020408.1    | PREDICTED: PISSLRE (LOC737753)                                        | ctg   | Pan troglodytes       |
| U73824.1       | p97                                                                   | gtg   | Homo sapiens          |
| U76111         | translation repressor NAT1                                            | gtg   | Homo sapiens          |
| XM_001170734   | PREDICTED: eukaryotic translation initiation factor 4 g2, tv 16 (EIF4 | gtg   | Pan troglodytes       |
| AY513274.1     | aging-associated protein 1 (AAG1)                                     | gtg   | Homo sapiens          |
| NM_013507.3    | eukaryotic translation initiation factor 4, gamma 2 (Eif4g2), tv 1    | gtg   | Mus musculus          |
| U76113         | Oryctolagus cuniculus translation repressor NAT1 mRNA                 | gtg   | Oryctolagus cuniculus |
| XM_858867.1    | PREDICTED: Eukaryotic translation initiation factor 4 g2 (eIF4G 2)    | gtg   | Canis familiaris      |
| XM_514571.2    | PREDICTED: hemopoietic cell kinase (HCK)                              | ctg   | Pan troglodytes       |
| XM_001166452.1 | PREDICTED: JAW1-related protein (MRV11)                               | ctg   | Pan troglodytes       |
| XM_001099716.1 | PREDICTED: JAW1-related protein isoform a, tv 3 (LOC702830)           | ctg   | Macaca mulatta        |
| XM_001137214.1 | PREDICTED: MyoD family inhibitor domain containing isoform            | gtg   | Pan troglodytes       |
| XM_001164025.1 | PREDICTED: pregnane X receptor, tv 2 (NR1I2)                          | ctg   | Pan troglodytes       |
| NM_001018042.1 | trans-acting transcription factor 3 (Sp3)                             | ata   | Mus musculus          |
| XM_846960      | PREDICTED: trans-acting transcription factor 3 isoform 1              | ata   | Canis familiaris      |
| XM_001166908.1 | PREDICTED: stromal interaction molecule 2                             | ttg   | Pan troglodytes       |
| XM_538879.2    | PREDICTED: Transcriptional enhancer factor TEF-5 (TEAD-3)             | ata   | Canis familiaris      |
| XM_605145.2    | PREDICTED: TEA domain family member 4 isoform 1 (LOC526771)           | ttg   | Bos taurus            |
| XM_001138640.1 | PREDICTED: Wilms tumor 1 (WT1)                                        | ctg   | Pan troglodytes       |
| XM_001084704.1 | PREDICTED: Wilms tumor 1 isoform B (LOC696061)                        | ctg   | Macaca mulatta        |
| XM_001162510.1 | PREDICTED: proto-oncogene (JUND)                                      | gag   | Pan troglodytes       |
| NM_005354.3    | proto-oncogene (JUND)                                                 | gag   | Homo sapiens          |
| XM_864639.1    | PREDICTED: proto-oncogene, tv 2 (LOC517192)                           | gag   | Bos taurus            |
| XM_847192.1    | PREDICTED: Transcription factor jun-D, tv 2                           | gag   | Canis familiaris      |
| XM_001075655.1 | PREDICTED: leukocyte tyrosine kinase (Ltk), tv 3                      | ctg   | Rattus norvegicus     |
| XM_001075610.1 | PREDICTED: leukocyte tyrosine kinase (Ltk), tv 1                      | ctg   | Rattus norvegicus     |
| NM_001044263.1 | regulatory factor X-associated protein                                | acg   | Rattus norvegicus     |
| HSU63824       | transcription factor RTEF-1 (RTEF1) mRNA, complete cds                | ttg   | Homo sapiens          |
| AF054589       | HIC protein isoform p40 and HIC protein isoform p32                   | gtg   | Homo sapiens          |
| M57423         | phosphoribosylpyrophosphate synthetase subunit III mRNA               | acg   | Homo sapiens          |
| NM_002820      | parathyroid hormone-like hormone (PTH1LH), tv 2                       | ctg   | Homo sapiens          |
| NM_001032882   | pregnane X receptor (PXR)                                             | ctg   | Macaca mulatta        |
| NM_138606      | proviral integration site 2 (Pim2)                                    | ctg   | Mus musculus          |
| NM_001014223   | deoxyribonuclease 1-like 1 (Dnase111)                                 | ctg   | Rattus norvegicus     |
| NM_027109      | deoxyribonuclease 1-like 1 (Dnase111)                                 | ctg   | Mus musculus          |
| NM_001099456   | neuropeptide W (NPW)                                                  | ctg   | Homo sapiens          |
| X52621         | leukocyte tyrosine kinase (Ltk)                                       | ctg   | Mus musculus          |

The provisional set of sequences were selected both from the annotated provisional non-AUG start sites and conserved non-AUG start sites found in aligned 120bp fragments containing the alternative start sites from the positive aTIS training set.
